1 **Title:** Data mining patented antibody sequences.

2

3 **Authors:** Konrad Krawczyk<sup>1,\*</sup>, Andrew Buchanan<sup>2</sup>, Paolo Marcatili<sup>3</sup>

4

5 **Affiliations:**

6

7 <sup>1</sup> NaturalAntibody, Hamburg, Germany

8 <sup>2</sup> AstraZeneca, Cambridge, United Kingdom

9 <sup>3</sup> Technical University of Denmark , Lyngby, Denmark

10

11 \* contact: [konrad@naturalantibody.com](mailto:konrad@naturalantibody.com)

12

13 **Abstract:**

14 Patent literature should be a reflection of thirty years of engineering efforts in developing  
15 monoclonal antibody therapeutics. Such information is potentially valuable for rational antibody  
16 design. Patents however are not designed to convey scientific knowledge, but rather legal  
17 protection. It is unclear whether antibody information from patent documents, such as antibody  
18 sequences could be useful for the therapeutic antibody sphere in conveying engineering know-  
19 how rather than act as legal reference only. To assess the utility of patent data for therapeutic  
20 antibody engineering, we quantified the amount of antibody sequences in patents destined for  
21 medicinal purposes and how well they reflect the primary sequences of therapeutic antibodies in  
22 clinical use. We identified 16,526 patent families from major jurisdictions (e.g. USPTO and  
23 WIPO) that contained antibody sequences. These families held 245,109 unique antibody chains  
24 (135,397 heavy chains and 109,712 light chains) that we compiled in our Patented Antibody  
25 Database (PAD, <http://naturalantibody.com/pad>). We find that antibodies make up a non-trivial  
26 proportion of all patent amino acid sequence depositions (e.g. 10.95% of USPTO Full Text  
27 database). Our analysis of the 16,526 families demonstrates that the volume of patent documents  
28 with antibody sequences is growing with the majority of documents classified as containing  
29 antibodies for medicinal purposes. We further studied the 245,109 antibody chains from patent  
30 literature to reveal that they very well reflect the primary sequences of antibody therapeutics in

31 clinical use. This suggests that patent literature could serve as a reference of previous  
32 engineering efforts to improve rational antibody design.

33

## 34 **Introduction**

35

36 The binding versatility of antibodies has been used for medicinal purposes making them the most  
37 successful group of biotherapeutics<sup>1</sup>. Typical timelines involved in bringing these molecules to  
38 the market are slow, however more and more molecules are approved in the US and EU each  
39 year<sup>1</sup>. Successful exploitation of antibodies by either experimental<sup>2,3</sup> or computational  
40 techniques<sup>4</sup> relies on our ability to understand what makes a successful antibody-based  
41 therapeutic<sup>5,6</sup>.

42

43 Therapeutic antibodies on the market and in late stage clinical trials have been previously studied  
44 by experimental<sup>2,7</sup> and computational<sup>6</sup> approaches to identify properties that make a successful  
45 biotherapeutic. Such studies<sup>2</sup> however only focused on 137 approved or post-phase-I antibodies  
46 (Clinical Stage Therapeutics, or CSTs), which is a small dataset in the light of the mutational  
47 space available to antibodies<sup>8</sup>. CSTs, are high-quality data-points that are end results of a long  
48 engineering process of selecting a molecule from a number of viable candidates. The single  
49 successful therapeutic molecule is therefore only partially representative of the engineering  
50 process. Full public disclosure of the efforts involved in developing a therapeutic antibody  
51 constituting intermediate sequences and selection decisions is not desirable because of the  
52 commercial value of such know-how, which needs to be legally protected.

53

54 Because of the need to protect the know-how involved in engineering therapeutic antibodies,  
55 relevant information needs to be disclosed in patent documents. Previous approaches to extract  
56 information on patent antibody landscape<sup>9</sup> or specific antibody formats<sup>10</sup> focused on keyword  
57 and patent classification searches. One can broadly discern between patents on antibody  
58 techniques (e.g. phage display, humanization) and novel antibody molecules. It is the patents on  
59 novel molecules that could be of particular engineering interest as these reflect the constructs that  
60 might find their way into the clinic. The disclosure of antibody sequence and target information<sup>11</sup>  
61 in such patents reveals to a certain extent the engineering choices as such molecules have been

62 subjected to myriad prior tests to be suitable candidates for expensive legal protection and further  
63 clinical trials.

64

65 The purpose of patent literature is not conveying scientific knowledge, but legal protection. In  
66 this work we assessed the utility of patent data for therapeutic antibody engineering efforts by  
67 establishing the extent to which antibodies from patents reflect therapeutics in clinical use. For  
68 this purpose, we identified patent documents that contained antibody sequences, to quantify how  
69 many of these were destined for medicinal purposes and how well they reflect advanced stage  
70 therapeutics.

71

## 72 **Results.**

73

### 74 **Antibodies account for a non-trivial proportion of sequences deposited in patent** 75 **documents.**

76

77 We identified documents with antibody sequences by downloading data from four data sources:  
78 USPTO (<http://uspto.gov>), WIPO (<http://wipo.int>), DDBJ<sup>12</sup>, and EBI<sup>13</sup>. Choice of the data  
79 sources was motivated by the availability of biological sequences and coverage of patent  
80 documents worldwide. Biological sequence information is not universally available in patent  
81 documents in all jurisdictions<sup>14</sup>. In certain cases, the data is not freely available, but rather  
82 accessible for a fee (e.g. European Patent Office). Primary access to biological sequences in  
83 machine-readable format is freely available from the USPTO and WIPO. USA is the largest  
84 pharmaceutical market<sup>15</sup>, compelling pharmaceutical companies developing a novel antibody  
85 therapeutic to seek patent protection within the jurisdiction of USPTO. Similarly, it is common  
86 to seek protection under the auspices of WIPO PCT system in order to spread the coverage of the  
87 patent documents across many jurisdictions worldwide. Furthermore, data from certain major  
88 jurisdictions, such as EPO, JPO and KPO are available via third parties such as DDBJ<sup>12</sup> and  
89 EBI<sup>13</sup>. Therefore, we argue that datasets made available via USPTO, DDBJ, WIPO and EBI  
90 provide a reasonable coverage of the worldwide antibody sequence patents.

91

92 We extracted raw sequence data from USPTO, WIPO, DDBJ and EBI on Jan 30<sup>th</sup> 2020, with the  
93 particulars of parsing the heterogenous sources described in Methods. From each dataset we  
94 extracted raw, redundant amino acid and nucleic acids sequences. Sequences containing  
95 exclusively nucleotides were translated to amino acids using IgBlast<sup>16</sup> as described previously<sup>17</sup>.  
96 Raw amino acid sequences were analyzed using ANARCI<sup>18</sup> to identify antibody variable region  
97 chains ( $V_H$ ,  $V_L$ , including scFvs). We report the number of raw sequences analyzed and the  
98 resulting identified antibodies in Table 1.

99

100 We find a higher proportion of sequences identified as antibodies in amino acid depositions  
101 which account for as many as 10.95% and 12.09% of USPTO-FT and DDBJ datasets  
102 respectively. In fact, large portion of sequences deposited in patents are very short; for instance  
103 in USPTO-FT only 1,811,694 (32.73%) amino acid sequences are longer than 50 amino acids,  
104 and antibodies make up 30.50% of these. This stands to show that antibodies make up a non-  
105 trivial volume of all the sequences deposited in patent documents.

106

107 Antibody sequence data in patents is however redundant to a large extent when one considers a  
108 unique sequence to be defined by its variable region. Combining all the non-redundant  $V_H$  and  
109  $V_L$  sequences from our datasets we count 245,109 unique antibody domains (135,397 heavy  
110 chains and 109,712 light chains). This suggests that many antibody variable region sequences are  
111 listed as part of multiple patent documents. Not all of these sequences however are guaranteed to  
112 have been developed for medical applications, which can be determined by analyzing the text  
113 content of patent documents.

114

115

116

117

118

119

120

121

122 **Table 1.** Published biological sequences and proportion thereof identified as antibody chains.  
 123 We extracted raw sequences from USPTO (divided between the full text, FT, and long listing  
 124 repository PSIPS), DDBJ, WIPO and EBI. The total number of raw sequences is given in column  
 125 Total Raw. Of these we show how many were identified by ANARCI as containing an antibody  
 126 chain (column Ab-identified). In the column “% Total” we report the proportion of identified  
 127 antibody sequences out of the total of raw sequences. Both Total Raw and Ab-identified columns  
 128 report the redundant number of sequences so as to exemplify the volume of antibody depositions  
 129 in patent sequences – we report the number of unique heavy (H) and light (L) chains in the  
 130 parentheses in column “Ab-identified”.

| Source      | Sequence Type | Total Raw   | Ab-identified<br>(unique Heavy (H), Light (L)) | %Total |
|-------------|---------------|-------------|------------------------------------------------|--------|
| USPTO FT    | Amino Acid    | 5,534,127   | 606,036<br>(H=52,388,L=38,922)                 | 10.95  |
|             | Nucleotide    | 7,068,248   | 229,547<br>(H=21,169,L=17,009)                 | 3.24   |
| USPTO PSIPS | Amino Acid    | 25,527,942  | 470,317<br>(H=33,806,L=24,086)                 | 1.84   |
|             | Nucleotide    | 176,840,912 | 376,567<br>(H=35,802,L=46,374)                 | 0.21   |
| DDBJ        | Amino Acid    | 4,412,209   | 533,762<br>(H=61,999,L=46,015)                 | 12.09  |
|             | Nucleotide    | 44,968,142  | 413,485<br>(H=35,290,L=28,502)                 | 0.91   |
| WIPO        | Amino Acid    | 10,275,174  | 435,218<br>(H=67,533,L=49,699)                 | 4.23   |
|             | Nucleotide    | 13,490,560  | 160,542<br>(H=35,747,L=27,275)                 | 1.19   |
| EBI         | Amino Acid    | 10,368,431  | 713,620<br>(H=73,450,L=50,326)                 | 6.88   |
|             | Nucleotide    | 12,349,772  | 38,366<br>(H=15,792,L=13,339)                  | 0.31   |

131

## 132 Patent landscape of documents containing antibody sequences

133

134 We analyzed the text content of patents containing antibody sequences so as to establish what  
 135 proportion of these list molecules for medicinal purposes. We connected all the redundant  
 136 antibody sequences to their patent documents and identified a patent family for each. A patent  
 137 family can be regarded as identifying documents with the same subject matter across several

138 jurisdictions. Altogether our 245,109 sequences are distributed among 16,526 patent families.  
139 We extracted the metadata from the patent documents, such as titles, abstracts, inventors and  
140 classifications. We used this information to determine the proportion of patents destined for  
141 medicinal applications by analyzing their classifications, and whether the inventors and listed  
142 targets resemble entities and molecules associated with development of monoclonal antibody  
143 therapies.

144

### 145 **Most patent documents citing antibody sequences are destined for medicinal applications.**

146

147 We analyzed the patent classifications of the 16,526 patent families that indicate the purpose of  
148 the invention described in each document. We extracted the Cooperative Patent Classification  
149 (CPC, developed by USPTO and EPO, <https://www.cooperativepatentclassification.org/>)  
150 designations from the documents as this was the most common listed scheme, covering 15,951  
151 (96.52%) out of 16,526 families. Patent classifications according to CPC have a section, class,  
152 subgroup, main group and a subgroup (e.g. classification C07K16/2866 has section C, class 07,  
153 subclass K, main group 16 and subgroup 2866). We divided the 15,951 families according to  
154 their CPC classifications excluding the subgroup (e.g. C07K16/2866 becomes C07K16) to reveal  
155 the general categories the documents fall into and present results in Table 2.

156

157 Subgroup C07K16 that indicates immunoglobulins, is the most common classification, present in  
158 13,790 (86.45%) of the 15,951 patent families. Families listing antibodies for medicinal purposes  
159 (A61K39) account for 9,459 (59.30%) of the 15,951 families. Furthermore the more general  
160 medicinal categorization A61K (preparations for medical, dental or toilet purposes) accounts for  
161 11,398 (71.45%) of the 15,951 patent families. This indicates that the majority of documents  
162 citing antibody sequences are developed for medicinal purposes, such as novel treatments or  
163 diagnostics. This is well reflected by the organizations that submit such patent applications,  
164 where 9 out of top 10 and 69 out of top 100 are pharmaceutical companies associated with  
165 development of monoclonal antibody therapies for a range of targets and disease indications (see  
166 Supplementary Section 1).

167

168

169 **Table 2.** Subclasses of the patent classifications. Most common subclasses associated with  
170 patents including antibody sequences according to the Cooperative Patent Classification (CPC,  
171 <https://www.cooperativepatentclassification.org/>). There were 15,951 patents containing  
172 antibodies with CPC classification and the percentage of families in each class is expressed as a  
173 proportion of this number.  
174

| CLASS    | TOTAL FAMILIES (%) | DESCRIPTION                                                                                                                                                                        |
|----------|--------------------|------------------------------------------------------------------------------------------------------------------------------------------------------------------------------------|
| C07K16   | 13,790 (86.4)      | Immunoglobulins [IGs], e.g. monoclonal or polyclonal antibodies (antibodies with enzymatic activity, e.g. abzymes)                                                                 |
| C07K2317 | 12,001 (75.2)      | Immunoglobulins specific features                                                                                                                                                  |
| A61K39   | 9,459 (59.3)       | Medicinal preparations containing antigens or antibodies                                                                                                                           |
| C07K2319 | 3,451 (21.6)       | Fusion polypeptide                                                                                                                                                                 |
| G01N33   | 3,105 (19.4)       | Investigating or analysing materials by specific methods not covered by groups G01N1/00 - G01N31/00                                                                                |
| C07K14   | 3,037 (19.0)       | Peptides having more than 20 amino acids; Gastrins; Somatostatins; Melanotropins; Derivatives thereof                                                                              |
| A61K47   | 2,392 (14.9)       | Medicinal preparations characterised by the non-active ingredients used, e.g. carriers or inert additives; Targeting or modifying agents chemically bound to the active ingredient |
| A61K38   | 2,058 (12.9)       | Medicinal preparations containing peptides                                                                                                                                         |
| C12N15   | 1,972 (12.3)       | Mutation or genetic engineering; DNA or RNA concerning genetic engineering, vectors, e.g. plasmids, or their isolation, preparation or purification; Use of hosts therefor         |
| A61P35   | 1,900 (11.9)       | Specific therapeutic activity of chemical compounds or medicinal preparations                                                                                                      |
| A61K45   | 1,671 (10.4)       | Medicinal preparations containing active ingredients not provided for in groups                                                                                                    |
| A61K31   | 1,415 (8.8)        | Medicinal preparations containing organic active ingredients                                                                                                                       |
| G01N2333 | 1,329 (8.3)        | Assays involving biological materials from specific organisms or of a specific nature                                                                                              |
| C12N5    | 816 (5.1)          | Undifferentiated human, animal or plant cells, e.g. cell lines; Tissues; Cultivation or maintenance thereof; Culture media therefor                                                |

175 **Targets of antibodies in patent documents correspond to known therapeutic targets.**

176  
177 We checked to what extent antibody targets reported in patent literature reflect those of known  
178 therapeutic antibodies. Each patent family in PAD was scanned for antibody target (see  
179 Methods). Therapeutic antibodies in clinical use together with their associated targets were  
180 compiled from the WHO lists of International Nonproprietary Names<sup>19</sup> (INNs, e.g. list 122<sup>20</sup>)  
181 IMGT<sup>21</sup>, Antibody Society (<http://www.antibodysociety.org>) and Thera-SAbDab<sup>22,23</sup>, resulting  
182 in 563 unique INNs. We grouped the targets by number of patent families and therapeutic  
183 antibodies they were associated with. We present the results for top 30 targets sorted by the  
184 highest number of patent families in Table 3.

185

186 The number of patent families associated with a target appears to correspond to a larger number  
187 of therapeutic antibodies against the same target. Top 10 targets sorted by number of their patent  
188 families account for 114 (20.24%), top 30 account for 223 (39.60%) and top 100 account for 369  
189 (65.54%) out of 563 therapeutics. Therefore, targets from patents listing antibody sequences  
190 provide a reasonable reflection of the targets of currently available therapeutic antibodies. In fact  
191 the greater number of patent families per target can be associated with an earlier date of the said  
192 target being mentioned in a patent document (Figure 1A). It does not mean however that the  
193 patent space for monoclonal antibodies is saturated as the number of new targets mentioned is  
194 increasing (Figure 1B). This suggests that studying patent documents including antibody  
195 sequences could provide an early indication of their targets and thus activity in the field of  
196 therapeutic antibodies.

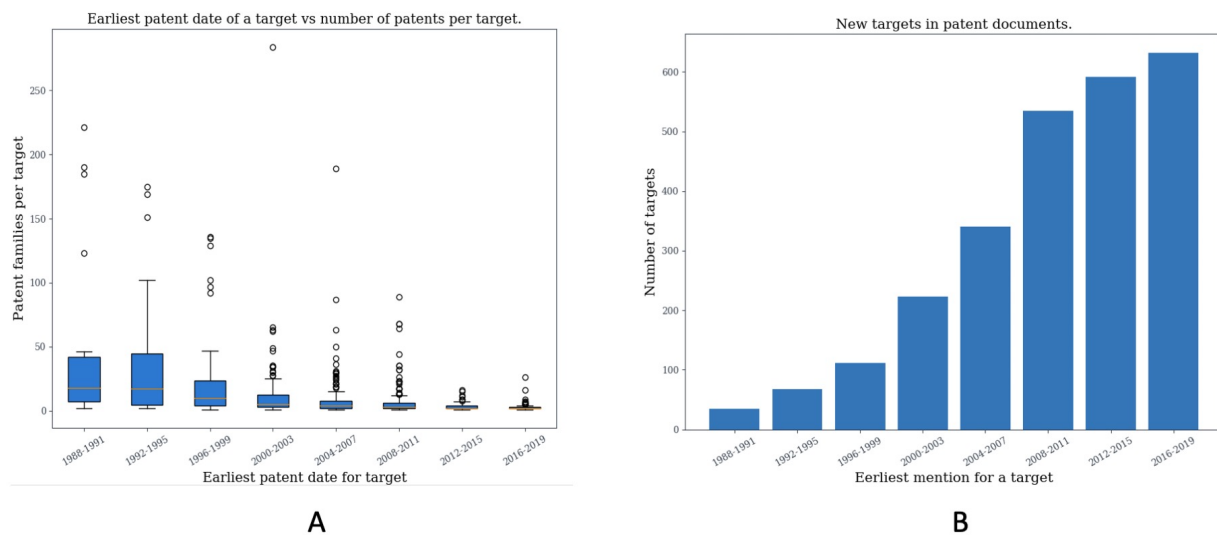

197

198 **Figure 1.** Target usage in patent documents reporting antibody sequences. A) Relationship  
199 between number of patent families per target and the earliest mention of the target in patent  
200 documents containing antibodies. For each target, we noted the earliest date among patent  
201 documents citing it and grouped these into 4-year intervals. Within each interval we noted the  
202 total number of patent families for a given target and plotted the aggregate for each time interval.  
203 B) For each 4-year interval, we plot the number of new target names that were first introduced in  
204 a patent document at that time.

205



206 **Table 3. Top 30 targets in patent documents.** We extracted the targets of the antibodies in  
 207 patent documents and present top 30 ranked by the number of families where they were  
 208 mentioned. For each target, we show the number of patent families mentioning the target  
 209 (#Families), the number of therapeutics on the market/in the clinic against it (#Therapeutics) and  
 210 the cumulative number of therapeutics covered by the top targets (#Therapeutics cumulative).

| RANK | TARGET       | #FAMILIES | #THERAPEUTICS | #THERAPEUTICS<br>(CUMULATIVE) |
|------|--------------|-----------|---------------|-------------------------------|
| 1    | pd1          | 284       | 20            | 20                            |
| 2    | cd3          | 221       | 20            | 40                            |
| 3    | her1         | 190       | 17            | 57                            |
| 4    | pdl1         | 189       | 12            | 69                            |
| 5    | tnfa         | 185       | 6             | 75                            |
| 6    | her2         | 175       | 9             | 84                            |
| 7    | cd20         | 169       | 14            | 98                            |
| 8    | influenza    | 151       | 5             | 103                           |
| 9    | cmet         | 136       | 4             | 107                           |
| 10   | vegfa        | 135       | 7             | 114                           |
| 11   | amyloid beta | 129       | 8             | 122                           |
| 12   | hiv          | 123       | 2             | 124                           |
| =13  | il6          | 102       | 7             | 131                           |
| =13  | cd40         | 102       | 9             | 140                           |
| =13  | cd19         | 102       | 6             | 146                           |
| 14   | ctla4        | 97        | 6             | 152                           |
| =15  | il17         | 92        | 8             | 160                           |
| =15  | igf1r        | 92        | 6             | 166                           |
| 16   | pcsk9        | 89        | 8             | 174                           |
| 17   | her3         | 87        | 6             | 180                           |
| =18  | rsv          | 73        | 5             | 185                           |
| =18  | cd38         | 73        | 5             | 190                           |
| =19  | tau          | 68        | 5             | 195                           |
| =19  | lag3         | 68        | 7             | 202                           |
| 20   | ox40         | 65        | 6             | 208                           |
| 21   | bcma         | 64        | 1             | 209                           |
| =22  | il23         | 63        | 5             | 214                           |
| =22  | cd47         | 63        | 2             | 216                           |
| 23   | ang2         | 62        | 2             | 218                           |
| 24   | vegfr2       | 56        | 5             | 223                           |

212 **There is a growing number of patent documents associated with antibody sequences.**

213

214 We analyzed the timestamps associated with patents in order to check whether there is a growing  
215 trend in releasing documents with antibody sequences and what proportion thereof is made up of  
216 molecules for medicinal indications. Each patent family lists several dates corresponding to the  
217 activity associated with the patent. We noted the earliest and most recent dates for each patent  
218 family to reflect the original submission dates and the most up-to-date activity respectively.

219

220 We plotted the earliest dates for each patent family in our dataset which indicates that the  
221 number of patent documents containing antibody sequences is steadily rising (Figure 2). The  
222 most recent dates associated with the same patent documents (Figure 2) shows a more acute rise  
223 since 2016 which indicates strong activity within the earlier submitted patents. Since not all  
224 patent families are explicitly destined for medicinal applications, we have plotted the  
225 corresponding earliest and most recent dates for the 9,459 documents classified as medicinal  
226 preparations containing antibodies (Supplementary Figure 1) which recapitulates the increasing  
227 number of patent documents being released.

228

229 Increasing patent activity in documents listing antibody sequences for medicinal indications is in  
230 line with the rising approval rates for antibody-based biologics<sup>1,24</sup>. Given that the patents are an  
231 early sign of approvals to come, it suggests that we can expect more biologics in the clinics in  
232 the foreseeable future. Since majority of such patent documents are indeed listing antibodies for  
233 medicinal purposes, the broad characteristics of the molecules listed in patent documents could  
234 provide an indication of the engineering choices in their design.

## Volume of patent documents including antibody sequences

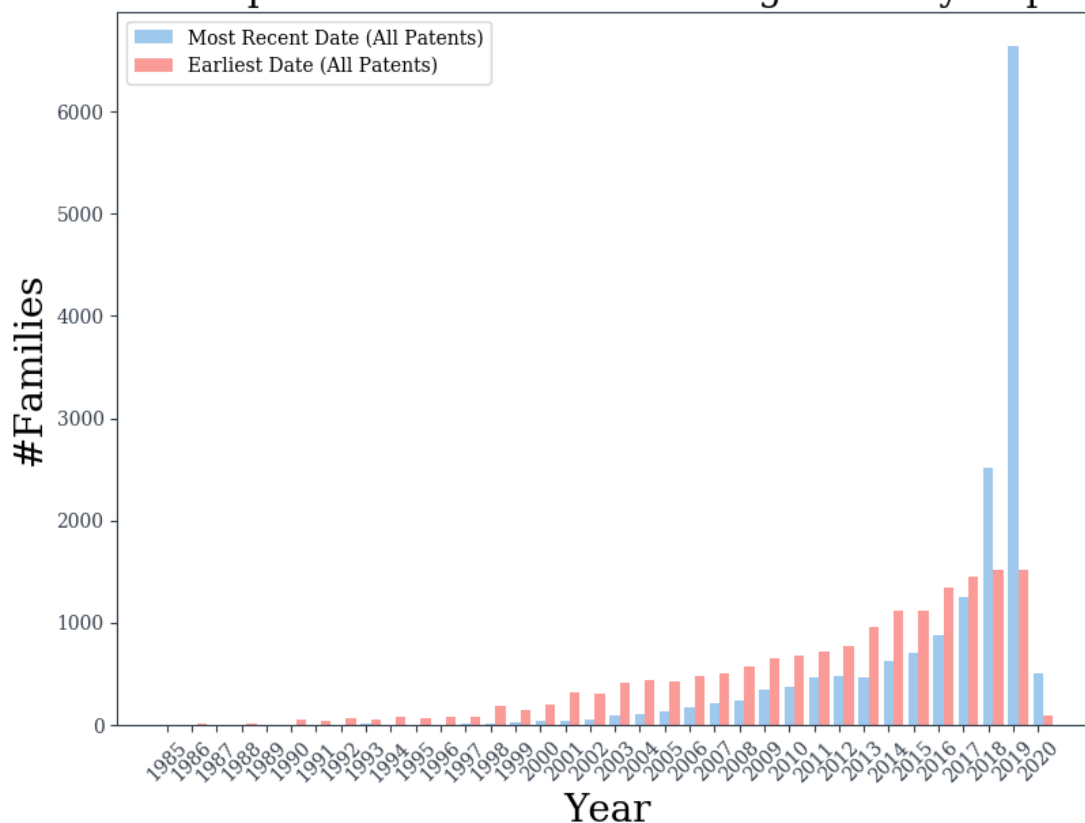

235  
236 **Figure 2.** The volume of patent family documents listing antibody sequences per year. For each  
237 patent family we noted the earliest and most recent dates of any documents associated with it and  
238 the aggregate numbers of these are given by red and blue bars respectively. The apparent low  
239 activity in 2020 can be attributed to the fact that data contributed in 2020 only account for  
240 January that year.

### 241 242 **The sequence landscape of patented antibodies.**

243  
244 Antibody sequences found in patent documents could reflect the broad decisions taken by  
245 engineers shaping these molecules before they arrive in the clinic. However, not all antibody  
246 sequences found in patent documents are destined for medicinal applications. For this reason we  
247 analyzed the broad sequence characteristics of antibodies from patent documents to establish to  
248 what extent they are a reflection of therapeutic antibodies in clinical use and vice-versa. We  
249 performed this analysis by looking at all of our antibodies from all patents (AllPatAb) and just  
250 the subset associated with documents classified as containing antibodies for medicinal

251 applications (MedPatAb). Altogether AllPatAb consisted of 135,397 heavy chains and 109,712  
252 light chains whereas MedPatAb consisted of 93,067 heavy chains (68.73% of all heavy chains)  
253 and 67,667 light chains (67.67% of all light chains).

254

255 **Most antibody sequences from patents align to human and mouse germline V region genes.**

256

257 We checked the patterns of organism-specific germline gene usage in antibody sequences  
258 originating from patent documents. Since organism reporting is not consistent in patent  
259 documents, we aligned the sequences in PAD to HMMs created from IMGT germline sequences  
260 for fifteen organisms: human, mouse, alpaca, rhesus, rabbit, rat, pig, cow, macaque, zebrafish,  
261 trout, salmon, dog, horse and chicken. For each organism and germline, we noted the total  
262 number of patent antibody sequences aligning to a given germline as well as the number of  
263 families they originated from.

264

265 We show the number of MedPatAb sequences that aligned to one of our fifteen organisms in  
266 Table 4 with the corresponding distribution for AllPatAb sequences in supplementary Table 2.  
267 Majority of the unique heavy sequences from patents for medicinal indications align to human  
268 germlines (72.80% of unique sequences), followed by mouse (15.39% of unique sequences). The  
269 same holds true for light chains with 67.72% of MedPatAb sequences aligning to human and  
270 19.68% to mouse germlines. Antibodies aligning to either mouse or human germlines are most  
271 frequently found within protein families. Human-aligned heavy and light chains can be identified  
272 in 75.69% and 69.76% patent families respectively. Mouse-aligned heavy and light chains can be  
273 found in 52.18% and 53.93% patent families respectively. This broad proportion is also reflected  
274 in all the antibody sequences from patents (AllPatAb), indicating that the medicinal patent  
275 classification does not skew the broad trend of majority of patented sequences aligning to human  
276 and mouse germlines. The alignment to those two organisms reasonably reflects the human focus  
277 of antibody development and the rodent antibodies that often serve as a basis for humanized  
278 therapeutics<sup>25</sup>.

279

280

281 **Germline V gene usage of antibodies from patent documents corresponds to a large extent**  
282 **with germline V gene usage of therapeutic antibodies.**

283

284 Given that majority of antibodies from patents align to human germlines, we stratified these by  
285 the particular human V-region genes. In Table 4 and 5 we report the most common V-region  
286 genes medicinal patent sequences align to (corresponding numbers for all patents can be found in  
287 Supplementary Table 3). We compare the distribution of germline genes in patents to the  
288 germline usage in therapeutic antibodies to show to what extent patent submissions reflect  
289 current therapeutics.

290

291 The top heavy and light V region genes are identical among medicinal patented sequences,  
292 medicinal patents and therapeutics. The most used human heavy chain V-gene by sequence,  
293 family and therapeutic usage is IGHV3-23, accounting for 25.29% of all patented medicinal  
294 sequences, occurs in 15.56% of all medicinal families and accounts for 16.38% of therapeutics.  
295 The most frequently observed human light chain germline usage is IGKV1-39, accounting for  
296 14.63% of all patented medicinal sequences, 12.84% of all medicinal patent families and 18.42%  
297 of therapeutic antibodies. Some of the most commonly observed genes might be the result of  
298 specific platform choices<sup>26</sup> that might attempt to recapitulate naturally observed frequencies<sup>8</sup> or  
299 focus on a small set of scaffolds<sup>27</sup>. The most frequently used germlines are broadly  
300 corresponding between patented sequences, medicinal patents and therapeutics, even though the  
301 ordering might not be the same. This indicates that the patent literature well reflects the choices  
302 of V-region genes of therapeutic antibodies in clinical use.

303

304

305

306

307

308

309

310

311 **Table 4.** Most common V-region gene species antibodies from patents aligned to. Antibodies  
 312 from patent documents destined for medicinal indications (MedPatAb) were aligned to fifteen  
 313 IMGT-derived<sup>28</sup> V region germlines from human, mouse, alpaca, rhesus, rabbit, rat, pig, cow,  
 314 macaque, zebrafish, trout, salmon, dog, horse and chicken. We noted the number of patent  
 315 sequences that aligned to the given species germline (#Unique Sequences) and the number of  
 316 patent families (#Patent Families) these originated from.  
 317

| HEAVY CHAIN | PER SEQUENCE |                   |            | PER FAMILY |                  |            |
|-------------|--------------|-------------------|------------|------------|------------------|------------|
|             | Organism     | #Unique Sequences | Percentage | Organism   | #Patent Families | Percentage |
|             | human        | 67754             | 72.80      | human      | 7070             | 75.69      |
|             | mouse        | 14326             | 15.39      | mouse      | 4874             | 52.18      |
|             | alpaca       | 7047              | 7.57       | macaque    | 485              | 5.19       |
|             | rabbit       | 1313              | 1.41       | horse      | 473              | 5.06       |
|             | macaque      | 1035              | 1.11       | alpaca     | 403              | 4.31       |
|             | horse        | 799               | 0.85       | rabbit     | 256              | 2.74       |
|             | chicken      | 417               | 0.44       | chicken    | 46               | 0.49       |
|             | dog          | 291               | 0.31       | dog        | 28               | 0.29       |
|             | rhesus       | 43                | 0.04       | rhesus     | 23               | 0.24       |
|             | cow          | 30                | 0.03       | cow        | 11               | 0.11       |
|             | pig          | 9                 | ~0         | pig        | 9                | 0.09       |
|             | rat          | 2                 | ~0         | rat        | 3                | 0.03       |
|             | salmon       | 1                 | ~0         | salmon     | 2                | 0.02       |
| LIGHT CHAIN | Organism     | #Unique Sequences | Percentage | Organism   | #Families        | Percentage |
|             | human        | 45828             | 67.72      | human      | 6312             | 69.76      |
|             | mouse        | 13320             | 19.68      | mouse      | 4880             | 53.93      |
|             | rhesus       | 5333              | 7.88       | rhesus     | 2238             | 24.73      |
|             | rabbit       | 1438              | 2.12       | rat        | 361              | 3.98       |
|             | rat          | 778               | 1.14       | rabbit     | 240              | 2.65       |
|             | chicken      | 505               | 0.74       | chicken    | 46               | 0.5        |
|             | dog          | 220               | 0.32       | cow        | 31               | 0.34       |
|             | cow          | 213               | 0.31       | dog        | 21               | 0.23       |
|             | pig          | 17                | 0.02       | pig        | 7                | 0.07       |
|             | horse        | 15                | 0.02       | horse      | 7                | 0.07       |

318

319

320 **Table 5.** Top-20 most common human V-region genes antibodies from patents aligned to. For  
 321 each patent antibody sequence for medicinal applications (MedPatAb) that aligned to human  
 322 germline V-regions, we noted the IMGT V-region gene. We show the number of unique  
 323 sequences that aligned to a given human V-region gene (Per Sequence) and number of patent  
 324 families these originated from (Per Family). We also show the number of therapeutic antibody  
 325 sequences in clinical use that align to the given V-region gene (Per Therapeutic).  
 326

| HEAVY<br>CHAIN | PER SEQUENCE |            |            | PER FAMILY |           |            | PER THERAPEUTIC |            |            |
|----------------|--------------|------------|------------|------------|-----------|------------|-----------------|------------|------------|
|                | Gene         | #Sequences | Percentage | Gene       | #Families | Percentage | Gene            | #Sequences | Percentage |
|                | IGHV3-23     | 17140      | 25.29      | IGHV3-23   | 2572      | 15.56      | IGHV3-23        | 77         | 16.38      |
|                | IGHV1-2      | 6206       | 9.15       | IGHV1-69   | 1369      | 8.28       | IGHV1-69        | 39         | 8.29       |
|                | IGHV1-69     | 5334       | 7.87       | IGHV3-30   | 1311      | 7.93       | IGHV1-46        | 38         | 8.08       |
|                | IGHV3-30     | 4501       | 6.64       | IGHV1-46   | 1136      | 6.87       | IGHV3-33        | 26         | 5.53       |
|                | IGHV1-46     | 3840       | 5.66       | IGHV1-2    | 1076      | 6.51       | IGHV3-48        | 21         | 4.46       |
|                | IGHV3-33     | 2508       | 3.7        | IGHV3-33   | 959       | 5.8        | IGHV3-30        | 21         | 4.46       |
|                | IGHV1-18     | 2445       | 3.6        | IGHV3-66   | 945       | 5.71       | IGHV1-2         | 21         | 4.46       |
|                | IGHV1-3      | 1774       | 2.61       | IGHV1-18   | 801       | 4.84       | IGHV1-18        | 19         | 4.04       |
|                | IGHV3-66     | 1725       | 2.54       | IGHV1-3    | 770       | 4.65       | IGHV3-66        | 18         | 3.82       |
|                | IGHV5-51     | 1590       | 2.34       | IGHV4-59   | 762       | 4.61       | IGHV1-3         | 18         | 3.82       |
|                | IGHV4-59     | 1553       | 2.29       | IGHV3-7    | 696       | 4.21       | IGHV3-7         | 14         | 2.97       |
|                | IGHV3-48     | 1356       | 2          | IGHV3-48   | 679       | 4.1        | IGHV5-51        | 13         | 2.76       |
|                | IGHV4-4      | 1260       | 1.85       | IGHV5-51   | 640       | 3.87       | IGHV3-74        | 13         | 2.76       |
|                | IGHV7-4-1    | 1185       | 1.74       | IGHV3-9    | 548       | 3.31       | IGHV4-59        | 12         | 2.55       |
|                | IGHV3-7      | 1136       | 1.67       | IGHV3-21   | 519       | 3.14       | IGHV7-4-1       | 10         | 2.12       |
|                | IGHV3-21     | 1104       | 1.62       | IGHV4-4    | 499       | 3.01       | IGHV3-9         | 10         | 2.12       |
|                | IGHV3-9      | 1060       | 1.56       | IGHV4-34   | 423       | 2.55       | IGHV4-4         | 9          | 1.91       |
|                | IGHV3-15     | 1011       | 1.49       | IGHV3-74   | 397       | 2.4        | IGHV4-39        | 8          | 1.7        |
|                | IGHV3-11     | 917        | 1.35       | IGHV3-11   | 392       | 2.37       | IGHV4-34        | 8          | 1.7        |
|                | IGHV4-31     | 894        | 1.31       | IGHV7-4-1  | 357       | 2.16       | IGHV2-70        | 8          | 1.7        |
| LIGHT<br>CHAIN | Gene         | #Sequences | Percentage | Gene       | #Families | Percentage | Gene            | #Sequences | Percentage |
|                | IGKV1-39     | 6709       | 14.63      | IGKV1-39   | 2123      | 12.84      | IGKV1-39        | 70         | 18.42      |
|                | IGKV3-20     | 3882       | 8.47       | IGKV3-11   | 1504      | 9.1        | IGKV3-11        | 48         | 12.63      |
|                | IGLV1-51     | 2997       | 6.53       | IGKV3-20   | 1335      | 8.07       | IGKV3-20        | 35         | 9.21       |
|                | IGKV3-11     | 2753       | 6          | IGKV4-1    | 1069      | 6.46       | IGKV4-1         | 23         | 6.05       |
|                | IGKV4-1      | 2484       | 5.42       | IGKV1-33   | 789       | 4.77       | IGKV1-16        | 19         | 5          |
|                | IGKV3-15     | 1811       | 3.95       | IGKV2-28   | 777       | 4.7        | IGKV1-33        | 18         | 4.73       |
|                | IGKV1-5      | 1722       | 3.75       | IGKV1-16   | 690       | 4.17       | IGKV3-15        | 15         | 3.94       |

|          |      |      |          |     |      |           |    |      |
|----------|------|------|----------|-----|------|-----------|----|------|
| IGKV1-12 | 1627 | 3.55 | IGKV1-5  | 669 | 4.04 | IGKV1-12  | 12 | 3.15 |
| IGKV1-33 | 1532 | 3.34 | IGKV1-12 | 669 | 4.04 | IGKV1-5   | 11 | 2.89 |
| IGLV3-19 | 1479 | 3.22 | IGKV3-15 | 633 | 3.83 | IGLV1-40  | 10 | 2.63 |
| IGKV2-28 | 1427 | 3.11 | IGLV2-14 | 561 | 3.39 | IGKV2-30  | 9  | 2.36 |
| IGLV1-47 | 1377 | 3    | IGKV1-27 | 558 | 3.37 | IGKV2-29  | 9  | 2.36 |
| IGLV1-44 | 1367 | 2.98 | IGLV3-1  | 454 | 2.74 | IGKV1-13  | 9  | 2.36 |
| IGLV2-14 | 1310 | 2.85 | IGLV1-44 | 427 | 2.58 | IGLV3-21  | 8  | 2.1  |
| IGLV3-1  | 1264 | 2.75 | IGKV2-30 | 418 | 2.52 | IGKV2-28  | 8  | 2.1  |
| IGKV1-17 | 1123 | 2.45 | IGLV3-21 | 412 | 2.49 | IGKV1-27  | 7  | 1.84 |
| IGLV1-40 | 1089 | 2.37 | IGLV1-47 | 409 | 2.47 | IGKV1-17  | 7  | 1.84 |
| IGKV1-16 | 1076 | 2.34 | IGLV1-40 | 407 | 2.46 | IGLV1-47  | 6  | 1.57 |
| IGLV3-21 | 1007 | 2.19 | IGLV3-19 | 371 | 2.24 | IGKV1-NL1 | 6  | 1.57 |
| IGKV2-30 | 812  | 1.77 | IGKV1-17 | 370 | 2.23 | IGLV3-19  | 5  | 1.31 |

327

328 **Antibodies from patent documents well reflect therapeutic antibody sequences, with the**  
329 **exception of CDR-H3 lengths.**

330

331 The germline gene distribution of antibody sequences from patents appears to reflect the  
332 germline gene distribution of therapeutic sequences, though such comparison is not fit to indicate  
333 the actual sequence discrepancies between the two datasets. We checked to what extent patented  
334 sequences are a reflection of therapeutics by pairwise sequence comparisons between the two  
335 datasets.

336

337 For each of the 563 therapeutics we checked if we can find a perfect length-matched hit in PAD.  
338 For 546 (96.98%) out of 563 therapeutics we found a perfect length-matched hit in PAD. For the  
339 remaining 17 therapeutics without perfect matches, we found that the PAD version used for this  
340 study (Jan 2020) was out of date or there existed only high sequence identity matches as  
341 compared to Lens.org but not perfect ones (Supplementary Table 4).

342

343 For each antibody sequence from a patent, we noted the highest IMGT sequence identity to any  
344 therapeutic and present the results stratified by AllPatAb and MedPatAb sequences in Figure 3.  
345 Large proportion of PAD sequences align with high sequence identity to one of the 563  
346 therapeutics. Total of 21,772 (16.08%) of heavy chain AllPatAb sequences and 17,378 (18,67%)



347 of heavy chain MedPatAb sequences have matches of 90% sequence identity or better to a  
348 therapeutic sequence. Total of 44,919 (40,94%) of light chain AllPatAb sequences and 31,241  
349 (46,16%) of light chain MedPatAb sequences have matches of 90% sequence identity or better to  
350 a therapeutic sequence. Altogether this illustrates that many sequences in patent documents well  
351 reflect the therapeutic antibody sequences currently in the clinical use. However there is also a  
352 large number of sequences with matches below 90% sequence identity to either heavy or light  
353 therapeutic heavy chain. This could reflect sequences that are only currently in development or  
354 never found their way to the clinic as a result of failure, abandonment or otherwise.  
355

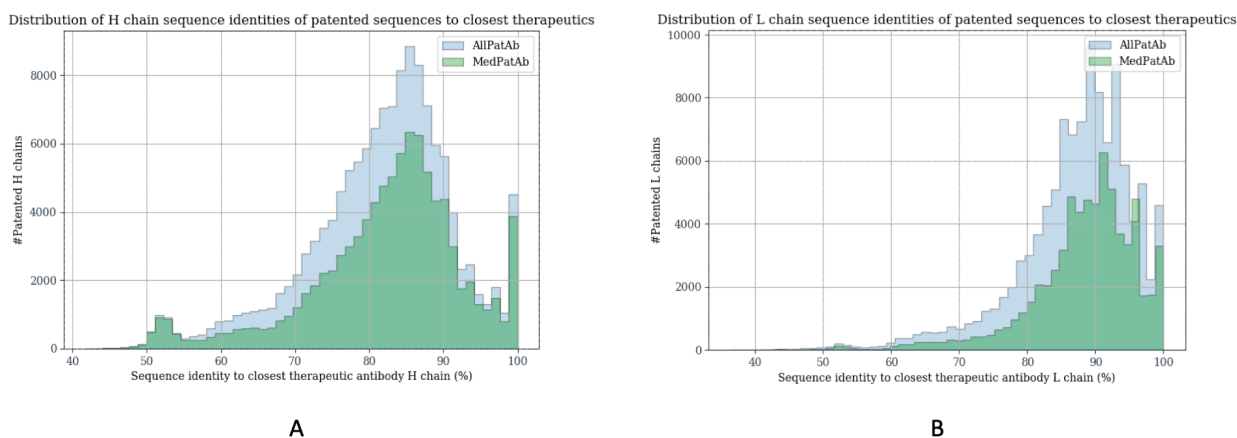

356 **Figure 3.** Closest matches of antibody sequences from patents to therapeutic antibodies. For  
357 each sequence in AllPatAb and AllPatMed we noted the closest IMGT sequence identity to a  
358 therapeutic antibody. A) Distribution of heavy chain sequence identities to closest therapeutic  
359 heavy chain. B) Distribution of light chain sequence identities to closest therapeutic light chain.  
360  
361 Perfect matches between full variable region PAD sequences and therapeutics implicitly  
362 indicates good correspondence in the CDR region. Arguably, the most diverse and thus the most  
363 engineered portion of an antibody is its heavy chain CDR3 region, CDR-H3<sup>29,30</sup>. The length of  
364 CDR-H3 has been previously shown to be a good estimator of overall developability of an  
365 antibody, with therapeutic antibodies having shorter CDR-H3<sup>6</sup>. We contrasted the CDR-H3  
366 lengths found in PAD to those in therapeutic, structural and natural human antibodies. We  
367 extracted CDR-H3s from antibody structures found in the Protein Data Bank<sup>31</sup> that are regularly  
368 collected by the Structural Antibody Database<sup>22</sup> (SAbDab). The natural human antibodies were  
369

370 sourced from a deep Next Generation Sequencing (NGS) study by Briney et al.<sup>8</sup> downloaded  
371 from the Observed Antibody Space database<sup>17</sup>. We found a total of 58,383 unique CDR-H3s in  
372 all PAD sequences (AllPatAb), 37,247 unique CDR-H3s in antibodies from medicinal patents  
373 (MedPatAb), 422 unique CDR-H3s in therapeutics, 2021 unique CDR-H3s in structures and  
374 73,217,582 unique CDR-H3s from natural human antibodies. We plotted the distribution of  
375 lengths for each of these datasets in Figure 4.

376  
377 The distribution of CDR-H3 lengths from patent sequences does not appear to be different  
378 between AllPatAb and MedPatAb sequences. Therapeutic CDR-H3s have the shortest median  
379 lengths, followed by structures, patents and natural human antibodies. The shorter lengths in  
380 structures might be reflective of large number of artificial/therapeutic antibodies that can be  
381 found in SAbDab<sup>23</sup>. Lengths of CDR-H3s from patent sequences appear to be mid-range  
382 between therapeutic and natural antibodies. This suggests that patent antibody sequences might  
383 reflect certain amount of engineering of these molecules as they do not follow the natural  
384 distribution, normally favoring longer lengths. Nevertheless patent antibody CDR-H3 do not  
385 recapitulate the therapeutic CDR-H3 length distribution. Since vast majority of therapeutic CDRs  
386 can be found in sequences from patent documents, the discrepancy with the therapeutic length  
387 distribution can suggest certain engineering choices faced by those molecules not revealed in this  
388 study.

389

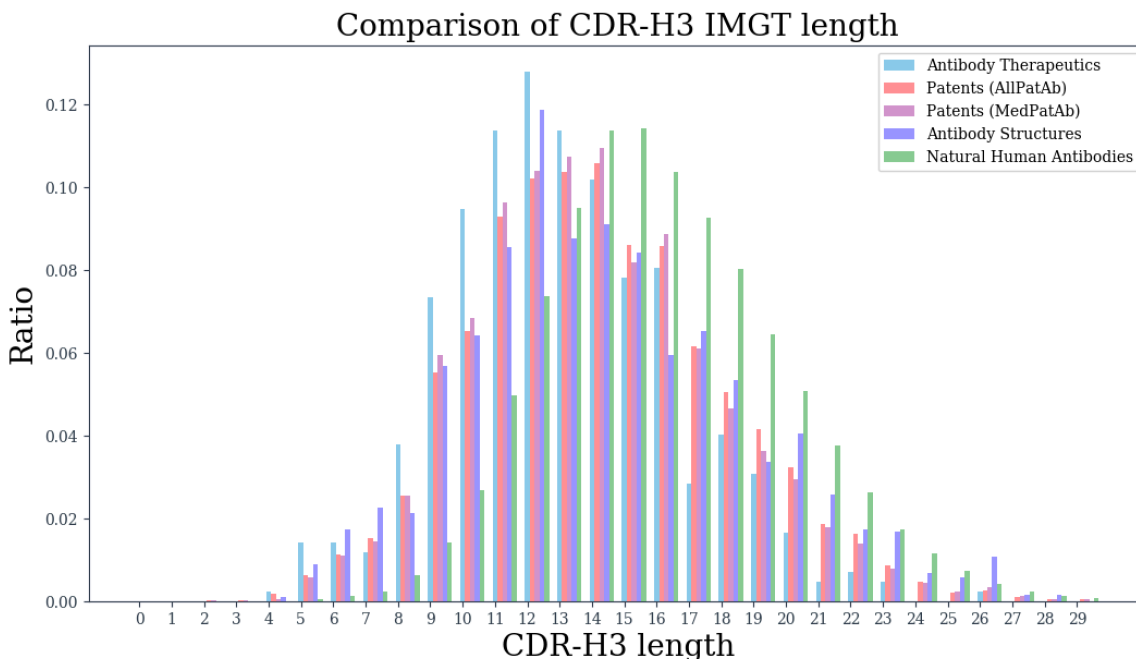

390  
391 **Figure 4.** Distribution of CDR-H3 lengths. We plotted the distribution of CDR-H3 lengths from  
392 therapeutic antibodies (Antibody Therapeutics), antibodies from patents in PAD (Patents,  
393 stratified between AllPatAb and MedPatAb), structures of antibodies from the Protein Data Bank  
394 (Antibody Structures) and natural human antibodies from a deep Next Generation Sequencing  
395 study (Natural Human Antibodies).

396  
397 **Patent landscape of single domain antibodies.**

398  
399 Our earlier results revealed that majority of antibodies from patents align well to human or  
400 mouse germline V region genes, which recapitulates the widespread use of ‘traditional’ antibody  
401 format containing both heavy and light chains. The third most commonly identified organism  
402 was alpaca (Table 4), which suggests the single domain antibody (sdAb) format. The single  
403 domain antibodies are found naturally in camelids (camels, lamas, alpacas) and because of the  
404 lack of light chain are believed to have more favorable biophysical properties than antibodies,  
405 without detriment to their antigen recognition ability<sup>32,33</sup>. They have been commercialized as  
406 therapeutics by Ablynx under the protected name Nanobody® with first single domain antibody  
407 drug, Caplacizumab, recently approved<sup>34</sup>. Allowing the first sdAb drug in clinical use holds the  
408 promise of more molecules in this format in the near future<sup>35</sup>, which can be reflected by patents.

409

410 We identified the total number of patent families in PAD having sdAbs to quantify the possible  
411 number of molecules in this format in development, providing an orthogonal view to currently  
412 known therapeutic candidates<sup>35</sup>. Patent families were classified as containing sdAbs if they were  
413 classified as C07K2317/569 (Single domain, e.g. dAb, sdAb, VHH, VNAR or nanobody®) or  
414 C07K2317/22 (from camelids, e.g. camel, llama or dromedary) or if they contained sequences  
415 aligning to alpaca sdAb germlines. Using the classification method we identified 845 families  
416 and using the alpaca germline method we found 867 families. There was an overlap between the  
417 two, resulting in total of 1,176 families identified as containing sdAbs or 7.11% of all of our  
418 16,526 families in PAD. Of the 1,176 families 586 (49.82%) were classified as containing  
419 antibodies for therapeutic purposes.

420

421 The top 30 organizations sorted by the number of families containing sdAb sequences  
422 (Supplementary Table 5) well reflect the companies developing biotherapeutics in this format<sup>35</sup>.  
423 The list however contains more organizations than those currently reported as developing sdAb  
424 therapies, suggesting that the field might be more nuanced, notwithstanding wide use of sdAbs  
425 for imaging and diagnostic purposes<sup>36</sup>. From the list of known sdAb therapeutics, our list does  
426 not contain AdAlta and Ossianix that report shark single domain antibodies, sequences of which  
427 we do not identify. In fact, not all sdAbs that we identified follow the natural camelid format, as  
428 there exist sequences of single domain human antibodies (e.g. US2011097339).

429

430 We checked the total number of sequences in PAD that could be identified as sdAbs. The 1,176  
431 patent families that we identified as containing sdAbs hold a total of 48,849 unique heavy chain  
432 sequences. Not all of such sequences are sdAbs as the patent document might have included  
433 traditional antibodies as well. Therefore we calculated the number of sequences that were  
434 identified as alpaca sdAb germlines and sequences found in one of the 1,176 families but  
435 containing only heavy chains. We found a total of 12,914 unique sequences aligning to sdAb  
436 alpaca germlines and 13,368 unique sequences found in 1,176 sdAb families containing heavy  
437 chains only. There was an overlap between the two sequence sets and combining them resulted  
438 in a total of 15,792 possible sdAb sequences, which makes up 11,66% of all the 135,397 heavy  
439 chain sequences in PAD. Of the 15,792 possible sdAb sequences, 8,342 (52.82%) were found in

440 patent documents classified as containing antibodies for medicinal purposes. Therefore, single  
441 domain antibody sequences appear to make up a non-trivial proportion of antibody sequences  
442 found in patents which could be indicative of upcoming sdAb clinical trials and approvals.

443  
444 In order to provide an indication of the possible activity to come in the field of single domain  
445 antibodies, we plotted the earliest and most recent dates associated with any of the 586 sdAb  
446 patent families classified as having antibodies for medicinal applications (Figure 5). There  
447 appears to be a steady increase in the number of patent documents including sdAb sequences for  
448 medicinal purposes (same holds true for all 1,176 patent families containing sdAb sequences,  
449 Supplementary Figure 2). Given the steady rise in the number of patents containing sdAbs and  
450 recent approval of Caplacizumab, one might expect more molecules in this format in clinical use  
451 in the future.

452

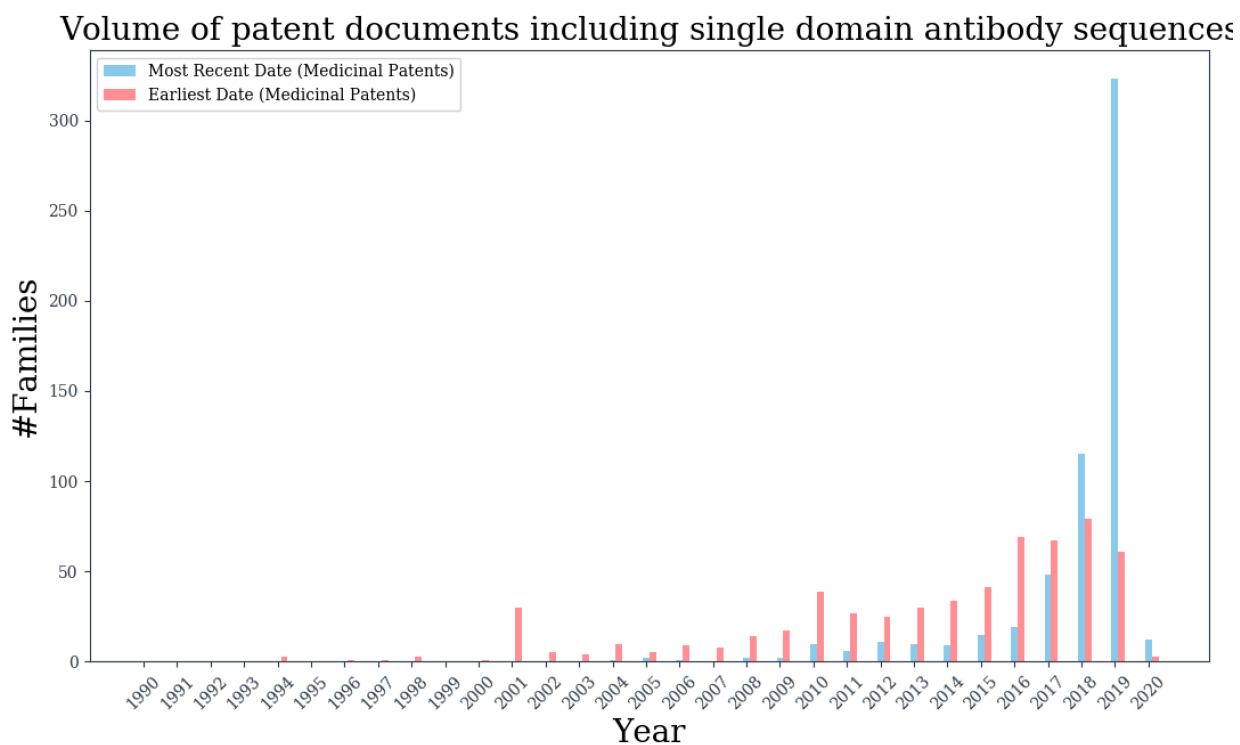

453  
454 **Figure 5.** Patents including single domain antibody sequences over time. For each of the 586  
455 patent families in PAD identified as having sdAbs and classified as containing antibodies for  
456 medicinal purposes, we noted the earliest and most recent dates, given as red and blue bars  
457 respectively.

458 **Discussion.**

459

460 Successful exploitation of antibodies as therapeutics relies on ever deeper understanding of the  
461 biology of these molecules. Many features of therapeutic antibodies can be found in naturally  
462 sourced sequences<sup>5</sup>, however effective biotherapeutic requires bespoke engineering for clinical  
463 safety and developability<sup>2</sup>. We proposed that such biotherapeutic engineering knowledge could  
464 be reflected in patent documents containing antibody sequences.

465

466 Our analysis of patents containing antibody sequences revealed that majority of such documents  
467 are explicitly developed as containing antibodies for medicinal purposes. Vast majority of  
468 therapeutic antibody sequences can be found in patent documents. Further to that, many  
469 sequences from patents are within close sequence identity of therapeutic antibodies that are  
470 approved or undergoing clinical trials. This suggests that thousands of antibodies from patents  
471 could provide a reflection of engineering choices that were made during development therapeutic  
472 molecules. Such data could offer an integrated collection of insights into the features that were  
473 designed into antibodies to make them successful therapeutics.

474

475 This information could be readily exploited by computational methods<sup>4</sup>. It was previously  
476 demonstrated that only 137 Clinical Stage Therapeutic (CST) antibodies can provide insights  
477 into developability of these molecules<sup>6</sup>. As demonstrated by our analysis, there is an order of  
478 magnitude more patented sequences that are close sequence matches to such CSTs. These could  
479 indicate different variants and possible features of biotherapeutics, creating a more wholesome  
480 picture of what makes a successful biotherapeutic.

481

482 Employing antibody sequences from patents however is not without its caveats. Unlike academic  
483 literature, patent documents are not designed to convey knowledge but rather offer legal  
484 protection. This might result in wide claims on sequence identities to proposed antibody variants  
485 that could obfuscate the resulting therapeutic sequence. As we demonstrated, antibodies in  
486 patents provide a good reflection of the therapeutics either approved or in clinical use. This  
487 would suggest that even though claims could be quite wide on sequence space, many of them  
488 appear to fall within the sequence identity orbit of currently available therapeutics. Therefore,

489 certain antibody sequences from patents could broadly reflect the engineering choices in the  
490 design of these molecules.

491  
492 The already large amount of antibodies from patent documents will most likely keep rising, as  
493 we demonstrated by the growth in the number of such documents in the recent years. In fact  
494 studying such patents could provide an early indication of approvals to come<sup>37</sup>. This might be  
495 specifically true in the sphere of single domain antibodies. There is just one such approved  
496 therapeutic on the market<sup>34</sup> and ten in clinical trials<sup>35</sup> (in 2019). We find a great number of sdAb  
497 patents suggesting that the field might further develop in the near future, providing an alternative  
498 to traditional monoclonal antibody therapy.

499  
500 The ongoing increase of patents containing antibodies for medicinal indications will keep  
501 contributing to an already ample body of knowledge of antibody engineering. This data could be  
502 used to offer insights into the engineering choices in designing these molecules, accelerating  
503 delivery of biotherapeutics to the clinic.

504

## 505 **Methods**

506

### 507 **Identifying antibody sequences in patent documents.**

508

509 Raw biological sequence data associated with patent documents was downloaded from four  
510 freely available accessible services: the United States Patent and Trademark Office (USPTO,  
511 <https://www.uspto.gov/>), the DNA Data Bank of Japan (DDBJ)<sup>12</sup>, European Bioinformatics  
512 Institute (EBI)<sup>13</sup> and World Intellectual Property Organization (WIPO, <https://www.wipo.int/>).  
513 The USPTO data were divided between the full text submissions (<https://bulkdata.uspto.gov/>)  
514 and lengthy sequence listings (<http://seqdata.uspto.gov/>). Using a custom Python script, the  
515 USPTO full text submissions were scanned for nucleotide or amino acid sequences and listings  
516 containing these, whereas USPTO PSIPS contained sequence listings only. Using a custom  
517 Python script the WIPO FTP documents ([ftp://tp.wipo.int/pub/published\\_pct\\_sequences](ftp://tp.wipo.int/pub/published_pct_sequences)) were  
518 scanned for nucleotide and amino acid sequences. In both cases of USPTO and WIPO,  
519 differences in sequence listing formats from different time periods was accounted for by

520 developing a custom Python parser for each case, transferring all the raw sequences and their  
521 associated patent numbers into FASTA format. Data from DDBJ and EBI are available through  
522 their ftp services ([ftp://ftp.ddbj.nig.ac.jp/ddbj\\_database](ftp://ftp.ddbj.nig.ac.jp/ddbj_database) and <ftp://ftp.ebi.ac.uk/pub/databases>  
523 respectively) and were readily available in FASTA format.

524

525 The nucleotide entries were scanned for antibody sequence by using IGBLAST<sup>16</sup> as described  
526 previously<sup>17</sup>, and their amino acid translations were noted. The raw amino acid sequences were  
527 scanned for presence of antibodies using ANARCI<sup>18</sup>. We only kept those amino acid sequences  
528 where all three CDR regions and all four framework regions could be identified and that  
529 contained only 20 canonical amino acids. This resulted in a dataset of IMGT-numbered amino  
530 acid sequences, associated with their patent numbers.

531

### 532 **Patent metadata acquisition and antibody target identification.**

533

534 Different patent numbers can point to the same document, submitted across several jurisdictions,  
535 termed ‘patent family’. For each patent number associated with a sequence we identified the  
536 patent family by using the Open Patent Services API v. 3.2 ([developers.epo.org/ops-v3-2](http://developers.epo.org/ops-v3-2)). Using  
537 the Open Patent Services API, we downloaded the metadata associated with each family which  
538 included: family identifier, title, description, patent numbers with associated dates and  
539 applicants.

540

541 The patent metadata was used for antibody target identification. Even though there exist certain  
542 CPC classifications indicating what the antibody should bind to, we noted that they were not  
543 universally present. Therefore we performed manual target annotation, supported by Named  
544 Entity Recognition (NER). We applied the GENIA NER<sup>38</sup> parser to the titles and abstracts of  
545 patent families. As with scientific publications titles and abstracts can be expected to reflect the  
546 most important content of the document<sup>39</sup>, in particular pertaining to the binding mode of the  
547 reported antibody. The resulting annotations accelerated the manual process of annotating each  
548 of our patent families with possible targets.

549

550



551 **Web Service.**

552

553 We make the data accessible for academic non-commercial use via web service accessible at  
554 <http://naturalantibody.com/pad>. Users can search for antibody sequences by pasting the amino  
555 acids of the variable domains. The input sequence is IMGT-numbered. The sequences in PAD  
556 are IMGT-aligned to the input sequence and the top 50 best sequence identity matches are  
557 displayed.

558

559 **Disclosure Statement.**

560

561 The authors declare no conflict of interest

562

563 **References**

564

- 565 1. Kaplon H, Muralidharan M, Schneider Z, Reichert JM. Antibodies to watch in 2020.  
566 MAbs 2020; doi: 10.1080/19420862.2019.1703531
- 567 2. Jain T, Sun T, Durand S, Hall A, Houston NR, Nett JH, Sharkey B, Bobrowicz B, Caffry  
568 I, Yu Y, et al. Biophysical properties of the clinical-stage antibody landscape. Proc Natl  
569 Acad Sci U S A 2017; doi: 10.1073/pnas.1616408114
- 570 3. Mason DM, Friedensohn S, Weber CR, Jordi C, Wagner B, Meng S, Reddy ST. Deep  
571 learning enables therapeutic antibody optimization in mammalian cells. bioRxiv 2019;  
572 doi: 10.1101/617860
- 573 4. Norman RA, Ambrosetti F, Bonvin AMJJ, Colwell LJ, Kelm S, Kumar S, Krawczyk K.  
574 Computational approaches to therapeutic antibody design: established methods and  
575 emerging trends. Brief Bioinform 2019; doi: 10.1093/bib/bbz095
- 576 5. Krawczyk K, Raybould MIJ, Kovaltsuk A, Deane CM. Looking for therapeutic antibodies  
577 in next-generation sequencing repositories. MAbs 2019; doi:  
578 10.1080/19420862.2019.1633884
- 579 6. Raybould MIJ, Marks C, Krawczyk K, Taddese B, Nowak J, Lewis AP, Bujotzek A, Shi  
580 J, Deane CM. Five computational developability guidelines for therapeutic antibody  
581 profiling. Proc Natl Acad Sci U S A 2019; doi: 10.1073/pnas.1810576116

- 582 7. Koenig P, Lee C V, Walters BT, Janakiraman V, Stinson J, Patapoff TW, Fuh G, Wilson  
583 IA. Mutational landscape of antibody variable domains reveals a switch modulating the  
584 interdomain conformational dynamics and antigen binding. *Proc Natl Acad Sci U S A* .  
585 2017 doi: 10.1073/pnas.1613231114
- 586 8. Briney B, Inderbitzin A, Joyce C, Burton DR. Commonality despite exceptional diversity  
587 in the baseline human antibody repertoire. *Nature* 2019; doi: 10.1038/s41586-019-0879-y
- 588 9. Petering J, McManamny P, Honeyman J. Antibody therapeutics - the evolving patent  
589 landscape. *N. Biotechnol.* 2011; doi: 10.1016/j.nbt.2011.03.023
- 590 10. Dumet C, Pottier J, Gouilleux-Gruart V, Watier H. Insights into the IgG heavy chain  
591 engineering patent landscape as applied to IgG4 antibody development. *MAbs* 2019; doi:  
592 10.1080/19420862.2019.1664365
- 593 11. Cole P. Patentability of genes: A European union perspective. *Cold Spring Harb Perspect*  
594 *Med* 2015; doi: 10.1101/cshperspect.a020891
- 595 12. Tateno Y. DNA Data Bank of Japan (DDBJ) for genome scale research in life science.  
596 *Nucleic Acids Res* 2002; doi: 10.1093/nar/gks1195
- 597 13. Li W, Mcwilliam H, de la Torre AR, Grodowski A, Benediktovich I, Goujon M, Nauche  
598 S, Lopez R. Non-redundant patent sequence databases with value-added annotations at  
599 two levels. *Nucleic Acids Res* 2009; doi: 10.1093/nar/gkp960
- 600 14. Jefferson OA, Köllhofer D, Ehrich TH, Jefferson RA. Transparency tools in gene  
601 patenting for informing policy and practice. *Nat Biotechnol* 2013; doi: 10.1038/nbt.2755
- 602 15. Shibata S, Uemura R, Suzuki T. Comparative Analysis Between the Top-Selling Drugs in  
603 the Japanese Pharmaceutical Market and Those in the United States, the United Kingdom,  
604 France, and Germany. *Ther Innov Regul Sci* 2016; doi: 10.1177/2168479015604182
- 605 16. Ye J, Ma N, Madden TL, Ostell JM. IgBLAST: an immunoglobulin variable domain  
606 sequence analysis tool. *Nucleic Acids Res* 2013; doi: 10.1093/nar/gkt382
- 607 17. Kovaltsuk A, Leem J, Kelm S, Snowden J, Deane CM, Krawczyk K. Observed Antibody  
608 Space: A Resource for Data Mining Next-Generation Sequencing of Antibody  
609 Repertoires. *J Immunol* 2018; doi: 10.4049/jimmunol.1800708
- 610 18. Dunbar J, Deane CM. ANARCI: Antigen receptor numbering and receptor classification.  
611 *Bioinformatics* 2015; doi: 10.1093/bioinformatics/btv552
- 612 19. Jones TD, Carter PJ, Plückthun A, Vásquez M, Holgate RGE, Hötzel I, Popplewell AG,

- 613 Parren PWHI, Enzelberger M, Rademaker HJ, et al. The INNs and outs of antibody  
614 nonproprietary names. *MAbs* 2016; doi: 10.1080/19420862.2015.1114320
- 615 20. International nonproprietary names for pharmaceutical substances (INN): proposed INN:  
616 list 122. *WHO Drug Inf* 2019; Available From  
617 <https://www.who.int/medicines/publications/druginformation/innlists/PL122.pdf>
- 618 21. Poiron C, Wu Y, Ginestoux C, Ehrenmann F, Duroux P, Lefranc M-P. IMGT/mAb-DB:  
619 the basis of IMGT data of therapeutic monoclonal antibodies. *Bull Cancer* 2010;  
620 Available from <http://www.imgt.org/mAb-DB/>
- 621 22. Dunbar J, Krawczyk K, Leem J, Baker T, Fuchs A, Georges G, Shi J, Deane CM.  
622 SAbDab: the structural antibody database. *Nucleic Acids Res* 2013; doi:  
623 10.1093/nar/gkt1043
- 624 23. Raybould MIJ, Marks C, Lewis AP, Shi J, Bujotzek A, Taddese B, Deane CM. Thera-  
625 SAbDab: the Therapeutic Structural Antibody Database. *Nucleic Acids Res* 2019; doi:  
626 10.1093/nar/gkz827
- 627 24. Walsh G. Biopharmaceutical benchmarks 2010. *Nat Biotechnol* 2010; doi:  
628 10.1038/nbt0910-917
- 629 25. Almagro JC, Fransson J. Humanization of antibodies. *Front Biosci* 2008; Available from  
630 <https://www.bioscience.org/2008/v13/af/2786/fulltext.htm>
- 631 26. Almagro JC, Pedraza-Escalona M, Arrieta HI, Pérez-Tapia SM. Phage Display Libraries  
632 for Antibody Therapeutic Discovery and Development. *Antibodies* 2019; doi:  
633 10.3390/antib8030044
- 634 27. Lee C V., Liang WC, Dennis MS, Eigenbrot C, Sidhu SS, Fuh G. High-affinity human  
635 antibodies from phage-displayed synthetic Fab libraries with a single framework scaffold.  
636 *J Mol Biol* 2004; doi: 10.1016/j.jmb.2004.05.051
- 637 28. Lefranc M paule, Giudicelli V, Regnier L, Duroux P. IMGT, a system and an ontology  
638 that bridge biological and computational spheres in bioinformatics. *Brief Bioinform* 2008;  
639 doi: 10.1093/bib/bbn014
- 640 29. Xu JL, Davis MM. Diversity in the CDR3 region of V(H) is sufficient for most antibody  
641 specificities. *Immunity* 2000; 13:37–45. doi: 10.1016/s1074-7613(00)00006-6
- 642 30. Knappik A, Ge L, Honegger A, Pack P, Fischer M, Wellnhofer G, Hoess A, Wölle J,  
643 Plückthun A, Virnekäs B. Fully synthetic human combinatorial antibody libraries

- 644 (HuCAL) based on modular consensus frameworks and CDRs randomized with  
645 trinucleotides. *J Mol Biol* 2000; doi: 10.1006/jmbi.1999.3444
- 646 31. Berman HM, Westbrook J, Feng Z, Gilliland G, Bhat TN, Weissig H, Shindyalov IN,  
647 Bourne PE. The protein data bank. *Nucleic Acids Res* 2000; doi: 10.1093/nar/28.1.235
- 648 32. Muyldermans S, Cambillau C, Wyns L. Recognition of antigens by single-domain  
649 antibody fragments: The superfluous luxury of paired domains. *Trends Biochem.*  
650 *Sci.*2001; doi: 10.1016/s0968-0004(01)01790-x
- 651 33. Bannas P, Hambach J, Koch-Nolte F. Nanobodies and nanobody-based human heavy  
652 chain antibodies as antitumor therapeutics. *Front. Immunol.*2017; doi:  
653 10.3389/fimmu.2017.01603
- 654 34. Duggan S. Caplacizumab: First Global Approval. *Drugs* 2018; doi: 10.1007/s40265-018-  
655 0989-0
- 656 35. Morrison C. Nanobody approval gives domain antibodies a boost. *Nat. Rev. Drug*  
657 *Discov.*2019; doi: 10.1038/d41573-019-00104-w
- 658 36. De Meyer T, Muyldermans S, Depicker A. Nanobody-based products as research and  
659 diagnostic tools. *Trends Biotechnol* 2014; doi: 10.1016/j.tibtech.2014.03.001
- 660 37. Pereira CG, Lavoie JR, Garces E, Basso F, Dabić M, Porto GS, Daim T. Forecasting of  
661 emerging therapeutic monoclonal antibodies patents based on a decision model. *Technol*  
662 *Forecast Soc Change* 2019; doi: 10.1016/j.techfore.2018.11.002
- 663 38. Tsuruoka Y, Tsujii J. Bidirectional inference with the easiest-first strategy for tagging  
664 sequence data. In: *HLT/EMNLP 2005 - Human Language Technology Conference and*  
665 *Conference on Empirical Methods in Natural Language Processing, Proceedings of the*  
666 *Conference*. 2005; Available from <https://www.aclweb.org/anthology/H05-1059.pdf>
- 667 39. Volanakis A, Krawczyk K. SciRide Finder: A citation-based paradigm in biomedical  
668 literature search. *Sci Rep* 2018; doi: 10.1038/s41598-018-24571-0
- 669
